# Supplementary material
Source: Research Square preprint supplement (doi:10.21203/rs.3.rs-9858969/v1)
Supplement: Supplementary file 3 [file fb1f70cfa66c36e8968f4a11.docx]

**Highlight:**

| - The P-SSBP prepared by co-pyrolysis modification of K3PO4 have the best adsorption. - The test group with 2% P-SSBP had the best Cd removal rates of 47.01% and 50.89%. - Soil total phosphorus content increased after P-SSBP was added to the soil. - P-SSBP inhibits the loss of organic matter and promotes the growth of ryegrass. |  |
| --- | --- |
