# Supplementary material
Source: Research Square preprint supplement (doi:10.21203/rs.3.rs-9858969/v1)

# Graphical Abstract:

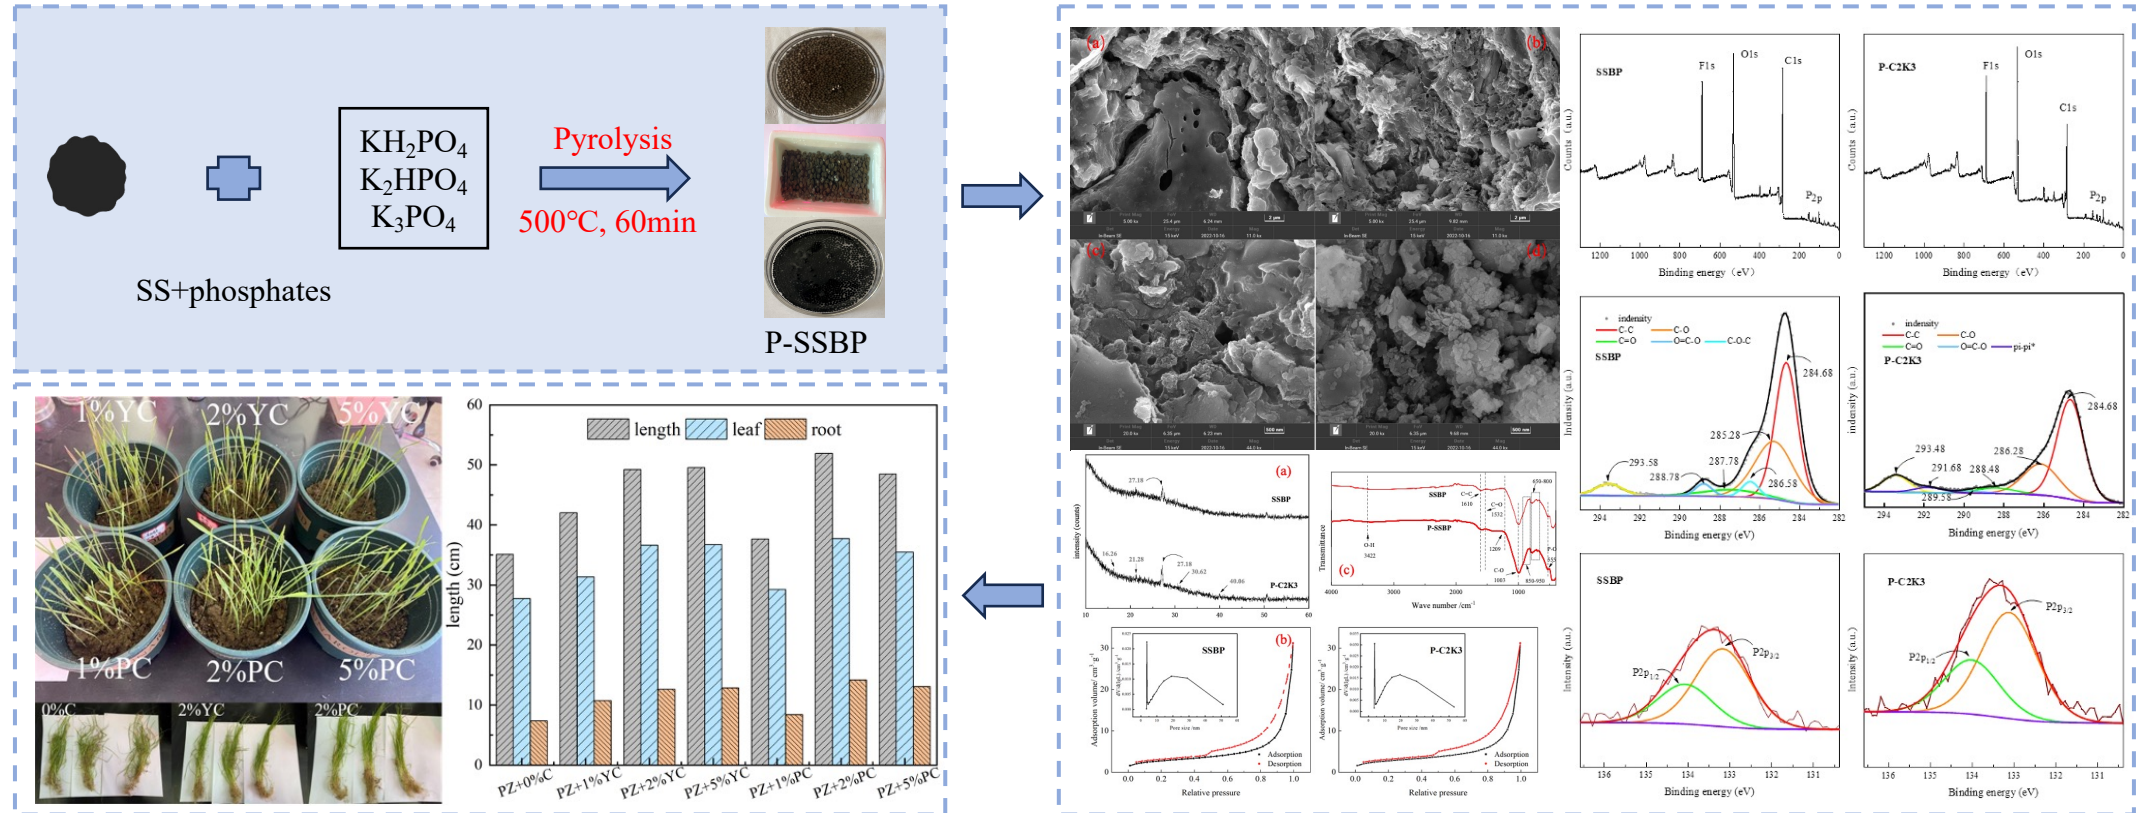

Supplement: Supplementary file 2 [file 8a74044aef4def3b499011a5.pdf]
